# Supplementary material for: The diagnostic yield of intellectual disability: combined whole genome low-coverage sequencing and medical exome sequencing
Source: BMC Med Genomics. 2020 May 19;13:70. doi: 10.1186/s12920-020-0726-x (PMC7236547; doi:10.1186/s12920-020-0726-x)
Supplement: Supplementary file 5 — Additional file 5: Supplemental Data Table S5. The clinical phenotype of 95 ID patients. [file 12920_2020_726_MOESM5_ESM.xlsx]

## Sheet: Sheet1
The clinical phenotype of 95 ID patients
Patient ID	Gender	Age	with	Clinical information
P01	Female	4 years 3 months	ID with MCA	Mental retardation, Abnormal finger, CHD
P02	Female	1 years 6 months	ID with MCA	Mental retardation, Recurrent respiratory infections, Simiancrease, Limbs Hypotonia
P03	Male	7 years	ID with MCA	Mental retardation, Asophia, Simiancrease, Facial abnormality
P04	Male	5 years 7 months	ID with MCA	Mental retardation, Poor hearing, Wide set eyes, Simiancrease, Hypotonia, Low set ears, Microphallus, Scrotum, High-vaulted arch
P05	Male	4 years 6 months	ID with MCA	Mental retardation, Abnormality of the palmar creases, Laryngomalacia, Muscular hypertonia, Facial abnormality
P06	Female	3 years 11 months	ID with MCA	Mental retardation, Small hands and feet, Hypoplastic labia minora, Hypotonia
P07	Male	3 years 3 months	ID with MCA	Mental retardation, Facial abnormality, Simiancrease
P08	Male	3 years 6 months	ID with MCA	Mental retardation, Hypotonia, Microphallus, Scrotum
P09	Male	4 years 7 months	other IDs	Mental retardation, asophia, and brain dysplasia
P10	Male	1 years 2 months	ID with MCA	Mental retardation, Shrill crying, Poor skin, Hypotonia, Cryptorchidism
P11	Male	4 years	ID with MCA	Mental retardation, Dwarfism, Abnormal appearance of skull
P12	Male	4 years	other IDs	Mental retardation, facial dysmorphism and global developmental delay, neonatal hypoglycemia
P13	Male	1 years 4 months	ID with MCA	Mental retardation, facial dysmorphism and global developmental delay, reproductive system abnormality
P14	Female	3 years 6 months	ID with MCA	Mental retardation, Cheilopalatognathus, CHD, Simiancrease, Low set ears, Blepharophimosis, Hyperspasmia
P15	Male	3 years 6 months	other IDs	Mental retardation
P16	Male	3 years 4 months	ID with ASD	Mental retardation, Autism
P17	Male	2 years 6 months	other IDs	Mental retardation
P18	Male	3 years 3 months	other IDs	Mental retardation, Cerebellar atrophy
P19	Male	3 years 2 months	other IDs	Dysphagia, Muscular hypertonia, Mental retardation, Brain dysplasia
P20	Female	1 years 11 months	ID with MCA	Simiancrease, High-vaulted arch, Hypotonia, Mental retardation
P21	Female	1 years 7 months	other IDs	Mental retardation, Cannot sit alone, Hypotonia
P22	Male	1 years 9 months	other IDs	Mental retardation, Hypotonia, Blepharophimosis
P23	Male	2 years 8 months	other IDs	Cannot head verticality, Mental retardation
P24	Female	4 years 5 months	ID with MCA	Mental retardation, Hypotonia, Feeding difficulties, Increased body weight slowly, Low set ears, Blepharophimosis, Small mouth, Right thumb syndactyly, Simiancrease
P25	Male	7 years	other IDs	Learning Disability, Hyperactivity, Hyperspasmia, Mental retardation
P26	Male	3 years 4 months	other IDs	Mental retardation, Retarded language development , High-vaulted arch
P27	Female	3 years 7 months	ID with ASD	Mental retardation, Autism
P28	Female	1 years 6 months	other IDs	Mental retardation, Hypotonia
P29	Male	4 years 6 months	ID with MCA	Mental retardation, High-vaulted arch, Hypotonia, Congenital cataract, Hypospadia, Laryngomalacia, Macrocephaly
P30	Male	7 years 8 months	ID with MCA	Mental retardation, Blepharophimosis, Wide set eyes, High-vaulted arch, Low set ears
P31	Female	2 years 8 months	ID with MCA	Mental retardation, Hypotonia, Laryngomalacia, Brain dysplasia
P32	Male	3 years 7 months	ID with MCA	Mental retardation, Wide set eyes, High-vaulted arch, Blepharoptosis of both eyes, Simiancrease, Hypotonia
P33	Male	2 years 11 months	ID with MCA	Mental retardation, Neonatal palatum mobile, Muscular hypertonia
P34	Male	2 years 2 months	ID with MCA	Mental retardation, Hypotonia, Feeding difficulties, Abnormal finger, Short penis
P35	Female	1 years 6 months	ID with MCA	Mental retardation, Capitulum, Simiancrease, Low set ears, High-vaulted arch, Micromandible, Blepharophimosis
P36	Female	6 years 7 months	ID with ASD	Mental retardation, Autism
P37	Female	3 years	other IDs	Cannot walk alone, Asophia, Mental retardation, Impaired vision
P38	Male	2 years 9 months	ID with MCA	Mental retardation, Psychomotor retardation, CHD, High set ears
P39	Male	3 years 4 months	other IDs	Mental retardation, Limbs Muscular hypertonia, Hyperspasmia
P40	Male	1 years 3 months	other IDs	Cannot sit or stand alone, Poor language comprehension, Leukomalacia symptom
P41	Female	1 years 9 months	ID with MCA	Mental retardation, Psychomotor retardation, Alvi profluvium, Muscular hypertonia
P42	Female	3 years 3 months	other IDs	Mental retardation, Hypotonia
P43	Male	5 years	ID with ASD	Mental retardation, Autism
P44	Male	2 years 8 months	other IDs	Mental retardation, Higher palatoglossus, Hypotonia, Brain dysplasia, EEG Abnormality, Convulsion
P45	Female	2 years 8 months	ID with ASD	Mental retardation, Autism
P46	Male	3 years 6 months	other IDs	Mental retardation, Gait instability, Leukodystrophy
P47	Male	3 years 5 months	ID with MCA	Mental retardation, High-vaulted arch, Hypotonia, Muscle volume decrease
P48	Male	4 years 4 months	ID with MCA	Mental retardation, Capitulum, High-vaulted arch, EEG Abnormality, Hyperspasmia
P49	Female	2 years 11 months	ID with MCA	Mental retardation, EP, Hypotonia, Dwarfism
P50	Male	4 years 9 months	ID with ASD	Mental retardation, Autism
P51	Male	9 years	other IDs	Mental retardation
P52	Female	1 years 7 months	ID with MCA	Mental retardation, CHD, Atresia of nasal passages, Hypotonia, Abnormality of cerebral MRI.
P53	Female	1 years2 months	other IDs	Neonatal eczema, Hypertonia, Callosal agenesis, Mental retardation
P54	Male	16 years	other IDs	Learning Disability, Mental retardation, Simiancrease
P55	Male	2 years 9 months	ID with MCA	Mental retardation, CHD, High-vaulted arch
P56	Male	3 years 3 months	ID with ASD	Mental retardation, Autism, Retarded language development, High-vaulted arch
P57	Male	7 years 5 months	ID with ASD	Mental retardation, Autism
P58	Male	4 years 8 months	ID with MCA	Mental retardation, Frontal bossing, Slightly wide set eyes, Hypotonia, Microphallus
P59	Male	4 years 7 months	ID with MCA	Mental retardation, Hexadactyly, High-vaulted arch, Micromandible, High set ears, Muscular hypertonia of lower limb
P60	Male	7 years 4 months	ID with MCA	Mental retardation, Capitulum, Low set ears, Hypotonia, Athetosis, Hyperspasmia
P61	Female	4 years 9 months	ID with MCA	Mental retardation, Scoliolosis, Low set ears, High-vaulted arch
P62	Male	1 years 2 months	ID with MCA	Mental retardation, High-vaulted arch, Blepharophimosis, Microphallus, Obesity
P63	Male	4 years 11 months	ID with ASD	Mental retardation, Autism
P64	Male	1 years 4 months	ID with ASD	Mental retardation, Autism
P65	Male	1 years 8 months	ID with MCA	Mental retardation, Anal atresia, Finger neoplasm, Blepharophimosis, Deafness, Low set ears
P66	Male	2 years7 months	other IDs	Mental retardation, Hypotonia
P67	Male	6 years	ID with MCA	Mental retardation, Retarded language development, Bat ear, Big hands and feet
P68	Female	2 years 11 months	ID with MCA	Mental retardation, Wide set eyes, High-vaulted arch, Synophridia, Low bridge of the nose, Deafness, Stubby fingers
P69	Male	2 years 5 months	ID with ASD	Mental retardation, Autism
P70	Male	1 years 2 months	ID with MCA	Mental retardation, Laryngomalacia, Simiancrease, Scrotum
P71	Female	1 years 6 months	other IDs	Mental retardation, Brain dysplasia
P72	Male	3 years 3 months	other IDs	Muscular hypertonia, Tendon reflex positive
P73	Male	1 years 6 months	ID with MCA	Mental retardation, Hypotonia, Winding of pinkie, Excessive rima oculi
P74	Male	1 years 6 months	ID with MCA	Mental retardation, Wide set eyes, Blepharophimosis, Microphallus
P75	Female	3 years 4 months	ID with MCA	Mental retardation, Hypotonia, Simiancrease, Small hands and feet
P76	Female	4 years 6 months	ID with MCA	Mental retardation, Neonatal eczema, Obesity, Simiancrease, Hypoplastic labia minora
P77	Male	5 years 11 months	other IDs	Mental retardation
P78	Male	4 years 2 months	ID with MCA	Mental retardation, Hypotonia, Facial abnormality
P79	Female	3 years 8 months	ID with MCA	Mental retardation, Frontal bossing, Short pinkie, Micrognathia
P80	Male	1 years 1 months	ID with MCA	Delayed language development, Mental retardation, Congenital cataract, Facial abnormality, Muscular hypertonia
P81	Female	7 years 5 months	ID with MCA	Mental retardation, Delayed language development, Learning Disability, Neonatal congenitally, Facial abnormality
P82	Male	7 years 2 months	ID with MCA	Mental retardation, Delayed language development, Simiancrease, High set ears, High-vaulted arch
P83	Male	3 years 7 months	ID with ASD	Mental retardation, Autism, Delayed language development
P84	Female	1 years 1 months	ID with MCA	Mental retardation, Capitulum, Facial abnormality, Arachnoid cyst
P85	Male	3 years2 months	ID with MCA	Mental retardation, Simiancrease, Muscular hypotonia of lower limb, Thin lower lip vermilion, High-vaulted arch
P86	Male	4 years 11 months	other IDs	Mental retardation, Delayed language development
P87	Male	6 years 11 months	ID with MCA	Learning Disability, Big tragi, High-vaulted arch, Micromandible, Wide set eyes, Scrotum, Mental retardation
P88	Male	3 years 5 months	other IDs	Mental retardation
P89	Male	3 years 6 months	ID with MCA	Mental retardation, Dwarfism, Short digit of limbs, Hypotonia, High-vaulted arch
P90	Female	2 years	ID with MCA	Mental retardation, Wide set eyes, Laryngomalacia, Simiancrease, Blepharophimosis, Hypotonia, Invisible cleft palate, Dwarfism
P91	Male	2 years 5 months	ID with ASD	Mental retardation, Autism
P92	Female	1 years 4 months	other IDs	Mental retardation
P93	Male	3 years	other IDs	Mental retardation, Delayed language development, Hyperactivity, Instability of gait
P94	Female	2 years 7 months	ID with ASD	Mental retardation, Autism
P95	Male	4 years 5 months	ID with MCA	Mental retardation, Contracture of joint, Abnormality of the palmar creases, Dislocation of bilateral hip joint, Abnormality of the phalanges of the toes
